# Supplementary material for: Remediating doctors’ performance to restore patient safety: a realist review protocol
Source: PubMed Central journal article supplement (PMC6224734; doi:10.1136/bmjopen-2018-025943), 2018-10-28
Supplement: bmjopen-2018-025943.draft_revisions.pdf [file bmjopen-2018-025943.draft_revisions.pdf]

# BMJ Open

BMJ Open is committed to open peer review. As part of this commitment we make the peer review history of every article we publish publicly available.

When an article is published we post the peer reviewers' comments and the authors' responses online. We also post the versions of the paper that were used during peer review. These are the versions that the peer review comments apply to.

The versions of the paper that follow are the versions that were submitted during the peer review process. They are not the versions of record or the final published versions. They should not be cited or distributed as the published version of this manuscript.

BMJ Open is an open access journal and the full, final, typeset and author-corrected version of record of the manuscript is available on our site with no access controls, subscription charges or pay-per-view fees (<http://bmjopen.bmj.com>).

If you have any questions on BMJ Open's open peer review process please email [editorial.bmjopen@bmj.com](mailto:editorial.bmjopen@bmj.com)

# BMJ Open

## Remediating doctors' performance to restore patient safety: A realist review protocol

|                               |                                                                                                                                                                                                                                                                                                                                                                                                                                                                                                                                                                                                                                                                                                                                             |
|-------------------------------|---------------------------------------------------------------------------------------------------------------------------------------------------------------------------------------------------------------------------------------------------------------------------------------------------------------------------------------------------------------------------------------------------------------------------------------------------------------------------------------------------------------------------------------------------------------------------------------------------------------------------------------------------------------------------------------------------------------------------------------------|
| Journal:                      | <i>BMJ Open</i>                                                                                                                                                                                                                                                                                                                                                                                                                                                                                                                                                                                                                                                                                                                             |
| Manuscript ID                 | bmjopen-2018-025943                                                                                                                                                                                                                                                                                                                                                                                                                                                                                                                                                                                                                                                                                                                         |
| Article Type:                 | Protocol                                                                                                                                                                                                                                                                                                                                                                                                                                                                                                                                                                                                                                                                                                                                    |
| Date Submitted by the Author: | 14-Aug-2018                                                                                                                                                                                                                                                                                                                                                                                                                                                                                                                                                                                                                                                                                                                                 |
| Complete List of Authors:     | Price, Tristan; University of Plymouth, Faculty of Medicine and Dentistry<br>Brennan, Nicola; University of Plymouth, Faculty of Medicine and Dentistry<br>Cleland, Jennifer; University of Aberdeen, Centre for Healthcare Education<br>Research and Innovation (CHERI)<br>Prescott-Clements, Linda; National Clinical Assessment Service<br>Wanner, Amanda ; University of Plymouth, NIHR Collaboration for<br>Leadership in Applied Health Research and Care South West Peninsula<br>(PenCLAHRC)<br>Withers, Lyndsey; University of Plymouth, Patient Partner<br>Wong, Geoff; University of Oxford, Nuffield Department of Primary Care,<br>Health Sciences<br>Archer, Julian; University of Plymouth, Faculty of Medicine and Dentistry |
| Keywords:                     | MEDICAL EDUCATION & TRAINING, REMEDIATION, MEDICAL<br>PERFORMANCE, PATIENT SAFETY                                                                                                                                                                                                                                                                                                                                                                                                                                                                                                                                                                                                                                                           |
|                               |                                                                                                                                                                                                                                                                                                                                                                                                                                                                                                                                                                                                                                                                                                                                             |

SCHOLARONE™  
Manuscripts

Only

## Covering letter:

Dear Editor,

Please find below our manuscript which reports a protocol for a realist review into doctor remediation.

The study is funded by the NIHR and has therefore already been through a peer review process. The study was awarded an NIHR HS&D Programme Grant (HS&DR 17/06/04). The NIHR are an Open Access advocating research body as listed by SHERPA Juliet. NIHR open access policies can be found at: <https://www.nihr.ac.uk/about-us/our-purpose/principles/nihr-open-access-policy.htm>.

All details of the study and confirmation that ethical approval is not required can be found on the NIHR Journals Library webpage:

<https://www.journalslibrary.nihr.ac.uk/programmes/hsdr/170604/#/>. We therefore think that our study meets the criteria for being considered for publication without going through peer review.

This is the first realist review into doctor remediation. The realist review method will allow us to develop findings that are directly translational to policy and will be of interest to anyone working in the development or operation of medical remediation. We are therefore keen to publish the protocol with BMJ Open and have allocated funds for this within our budget.

The fully manuscript follows and I have uploaded the PRISMA checklist in a separate document.

Best wishes, on behalf of all the co-authors on this paper,

Tristan

Dr Tristan Price

Research fellow in the Collaboration for the Advancement of Medical Education Research and assessment (CAMERA), Faculty of Medicine and Dentistry, University of Plymouth.

1  
2  
3 **TITLE:** Remediating doctors' performance to restore patient  
4 safety: A realist review protocol  
5  
6  
7

8  
9 **DURATION:** 18 months, started on 1<sup>st</sup> April 2018.  
10

11  
12 **AUTHORS:**  
13

14 Dr Tristan Price, Research Fellow in the Collaboration for the Advancement of Medical Education  
15 Research and Assessment, Faculty of Medicine and Dentistry, University of Plymouth  
16 tristan.price@plymouth.ac.uk,  
17

18 Dr Nicola Brennan, Research Fellow in the Collaboration for the Advancement of Medical Education  
19 Research and Assessment, Faculty of Medicine and Dentistry, University of Plymouth,  
20 nicola.brennan@plymouth.ac.uk  
21

22 Professor Jennifer Cleland, Institute of Education for Medical and Dental Sciences, School of  
23 Medicine, Dentistry and Nutrition, University of Aberdeen, jen.cleland@abdn.ac.uk  
24

25 Dr Linda Prescott-Clements, Lead Assessment & Intervention Adviser, NCAS (now within NHS  
26 Resolution), Linda.Prescott-Clements@ncas.nhs.uk  
27

28 Amanda Wanner, Information Specialist/Research Fellow, NIHR Collaboration for Leadership in  
29 Applied Health Research and Care South West Peninsula (PenCLAHRC), Community and Primary Care  
30 Research Group, University of Plymouth, amanda.wanner@plymouth.ac.uk  
31

32 Dr Lyndsey Withers, Patient Partner, University of Plymouth, lyndsey.withers@btinternet.com  
33

34 Dr Geoff Wong, Nuffield Department of Primary Care, Health Sciences, University of Oxford,  
35 grckwong@gmail.com  
36

37 Professor Julian Archer (corresponding), Faculty of Medicine and Dentistry, University of Plymouth,  
38 PL4 8AA, julian.archer@plymouth.ac.uk  
39  
40  
41  
42  
43  
44  
45  
46  
47  
48  
49  
50  
51  
52  
53  
54  
55  
56  
57  
58  
59  
60

## ABSTRACT

### Introduction:

Underperformance by doctors poses a risk to patient safety. Remediation is an intervention designed to remedy underperformance and return a doctor to safe practice. Remediation is widely used across healthcare systems globally, and is self-evidently important in terms of patient safety and doctor retention. Yet there is a poor evidence base to inform remediation programmes. In particular, there is a lack of understanding as to why and how a remedial intervention may work to change a doctor's practice. The aim of this research is to identify why, how, in what contexts, for whom and to what extent remediation programmes for practising doctors work to support patient safety.

### Methods and analysis:

Realist review is an approach to evidence synthesis that seeks to develop programme theories about how an intervention works to produce its effects. The initial search strategy will involve: database and grey literature searching, citation searching, and contacting authors. The evidence search will be extended as the review progresses and becomes more focused on the development of specific aspects of the programme theory. The development of the programme theory will involve input from a stakeholder group consisting of professional experts in the remediation process and patient representatives. Evidence synthesis will use a realist logic of analysis to interrogate data in order to develop and refine the initial programme theory into a more definitive realist programme theory of how remediation works. The study will follow and be reported according to RAMESES standards.

### Ethics and dissemination:

Ethical approval is not required. Our dissemination strategy will include input from our stakeholder group. Customised outputs will be developed using the Knowledge-To-Action Cycle framework, and will be targeted to: policy makers; education providers and regulators, the NHS, doctors and academics.

### Trial registration number:

The protocol is registered with PROSPERO 2018 CRD42018088779

## Article summary: strengths and limitations

### Strengths

- The first realist review of doctor remediation
- A realist methodology that will address the question of why, how, in what contexts, for whom and to what extent remediation programmes for practising doctors work to restore patient safety.
- Meaningful stakeholder input, including patient and public involvement (PPI), throughout the review will support the development and dissemination of contextually sensitive strategies for remediating underperformance in medicine.

### Limitations

- Based on secondary data generated from existing literature, therefore is limited by existing literature and its quality.

## INTRODUCTION AND BACKGROUND

The real human cost of medical underperformance is difficult to measure, but it is estimated that nearly 12,000 patients die in England each year as a result of preventable medical errors.<sup>2</sup> Yet the true societal costs when things go wrong are unknown. Incompetent doctors (of which there are relatively few) need to be stopped from practising; but there is a wider and harder problem to solve that will improve medical practice: doctors who underperform.

Doctors can experience performance issues at any stage in their careers and for many different reasons. Performance concerns are often complex, involving multifactorial issues encompassing knowledge, skills and professional behaviours.<sup>3-5</sup> To ensure patient safety, it is vital that if there are questions about the performance of a doctor they are identified quickly and, where appropriate, support is provided for the practitioner through remediation.<sup>6-8</sup>

Remediation is an intervention, or a range of interventions, that seek to return a doctor to safe practice in response to identified underperformance.<sup>9-10</sup> Not only is remedying underperformance a matter of patient safety, but is also both a practical and a financial imperative. In the UK, it is estimated that it costs around £250,000 to train a doctor to the point of graduation from medical school, rising to £500,000 at the point when a doctor completes specialty training.<sup>11</sup> Added to this is the cost of litigation; the NHS paid out more than £1.4 billion in medical negligence claims in 2015/16 alone, up from £1.2 billion the year before.<sup>12</sup> Moreover, in the UK, the number of doctors entering the profession is not keeping pace with projected levels of demand, particularly in certain specialties (GPs, Psychiatrists and specialists in long term conditions) and in particular geographical locations.<sup>13</sup> This trend towards an imbalance in the medical workforce is global in scope and exists across developing and developed countries.<sup>14-15</sup> Given that recruiting and training a sufficient supply of qualified doctors, within the necessary specialties, is a huge investment for any healthcare system, remedying underperformance where possible will be an important component of a sustainable healthcare policy.

Despite the importance of remediation and its prevalence across healthcare systems globally, relatively little is known about how it works and the extent to which it works. A 2009 systematic review by Hauer et al. on the remediation of practising doctors reported that there is “surprisingly little evidence to guide remediation in medical education at all levels”.<sup>16 p.1827</sup> A more recent systematic review by Cleland et al. in 2013, on the remediation of medical students and doctors in training, found that “rigorous approaches to developing and evaluating remediation interventions are required”.<sup>17 p.242</sup> The Cleland et al. review also found that few of the studies that were included reported having informed their approaches with relevant theory.

A further weakness with the existing evidence base for remediation is that it does not sufficiently inform the development of remediation programmes. As noted by Cleland et al., “we do not know what types of support work, or how much extra teaching is critical... we cannot delineate precisely what works, and why, in remedial interventions”.<sup>17 p.248</sup> In other words, in order to design high-quality remediation interventions, it is fundamental to understand how the remediation of doctors is supposed to work, for whom, and the contexts that lead to different outcomes.

Remediation covers a broad array of interventions, occurs across a range regulatory jurisdictions, in different settings within those jurisdictions, and at different stages of a doctor’s career. As such, there is a clear need for research that builds theoretically rich explanations of how remediation works, and does so in such a way that is appreciative of the varying circumstances in which

remediation occurs.<sup>18</sup> Theory-led research is important because it is able to deliver findings at a level of abstraction whereby they are transferable to a range of interventions, while being close enough to actual practice to be relevant to those who plan and deliver remedial interventions.<sup>19</sup>

## METHODS AND ANALYSIS

### Research questions

The overarching aim of this research is to identify how and why remediation interventions work to improve the performance of doctors. Central to realist methodology (described below) is an acknowledgement that the contexts surrounding a remedial intervention, and the way in which a remedial intervention changes the context, will determine the success or otherwise of a remedial programme. Accordingly, the main research question guiding this review is:

Why, how, in what contexts, for whom and to what extent do remediation programmes for practising doctors work to support patient safety?

This research question is operationalised into two main objectives:

1. To conduct a realist review of the literature to ascertain why, how, in what contexts, for whom and to what extent do remediation programmes for practising doctors work to support patient safety.
2. To provide recommendations on tailoring, implementation and design strategies to improve remediation interventions for doctors.

### Realist review

The research question will be addressed by using a realist approach to evidence synthesis, also known as a realist review. A realist review is rooted in the philosophy of realism and seeks to develop theories about how an intervention works to produce its effects. Central to the realist review approach is the generative model of causality which holds that to infer a causal outcome between any two events requires an understanding of the “causal mechanisms (M) that connect them and the context in which relationships occur”.<sup>20</sup> Essentially, this means developing and then interrogating a theory, or theories, about how remediation interventions work.

The context in which an intervention occurs is central to a realist explanation of how that intervention works to produce its effects. Context may relate to the specific structures or the environment surrounding an intervention, or to characteristics of those individuals delivering or receiving the intervention.<sup>20</sup> However, the realist approach seeks not to simply list all the contextual factors surrounding an intervention, but to establish which of the contextual factors are necessary to explain how the intervention produces the outcome. That is where the concept of the mechanism comes into play. Mechanisms are the way in which a programme’s resources or opportunities interact with the reasoning of individuals and lead to changes in behaviour. Mechanisms are usually hidden in that they are often not labelled as an official component of the programme, but can be deduced through research into how those types of programme work for particular people in particular circumstances to produce the desired outcome.<sup>21</sup>

A key part of the realist review approach is developing a programme theory, or theories. A programme theory is a description and/or a diagram that depicts how the intervention is supposed to work to produce its effects. Any programme theories developed should be specified at the middle-range level of abstraction – in other words specified in such a way that permits them to be

1  
2  
3 'tested' against the empirical data from documents included in the realist review. Importantly, a  
4 realist review starts and ends with a programme theory; the programme theory is developed,  
5 interrogated and refined through an iterative process of collecting and analysing data from a variety  
6 of sources.  
7

8 Realist reviews are, therefore, particularly suited to understanding complex and multifaceted  
9 interventions like remediation, where a variety of approaches are employed within different  
10 contexts.  
11

## 12 13 **Study design**

14 Pawson has developed five practical steps to conduct realist reviews that will guide the research  
15 process in this study.<sup>22</sup> It is important to note that although these stages are numbered sequentially,  
16 realist reviews are iterative by nature and therefore there will be some movement between stages  
17 as the research progresses. The study findings will be written up according to the RAMESES quality  
18 and publication standards.<sup>23</sup> This protocol is reported according to PRISMA-P guidelines.<sup>24</sup>  
19  
20

### 21 **Step 1: Locate existing theories**

22  
23 This stage involves identifying the existing theories that explain how remediation is supposed to  
24 work. To identify these theories, we shall search relevant personal libraries of members of the  
25 review team. The research fellow (TP) will also undertake informal searches of the existing literature,  
26 informed by previous research into remediation undertaken by members of the review team (TP, JA,  
27 NB, JC) to develop the funding application for this review. We shall also iteratively consult with  
28 recognised experts in the remediation field, some of whom are co-applicants on this review (JC, LP-  
29 C), and others with whom we collaborate. In addition, we shall undertake relatively open searches of  
30 databases such as Google Scholar using keywords such as 'remediation'. The initial programme  
31 theory will be developed by TP through identifying some of the key activities that occur in  
32 remediation programmes and any existing explanations of how such activities work to bring about  
33 changes in doctor performance related to areas such as knowledge, skills, attitudes, professional  
34 behaviours or the workplace environment.  
35

36  
37 We have established a stakeholder group to help develop the initial programme theory and refine  
38 the theory as the review progresses. The stakeholder group is comprised of a variety of professionals  
39 working within medicine (including doctors who have undergone remediation) and non-clinicians  
40 within clinical settings, representatives from doctor and patient groups, the medical regulator (the  
41 General Medical Council), and the National Clinical Assessment Service (NCAS). NCAS is an important  
42 collaborator in this review as they are the NHS body that provides advice, support and assessment  
43 services to help resolve concerns about the professional practice of doctors in the UK (as well as  
44 dentists and pharmacists).  
45

46  
47 The stakeholder group will assist with the development of the initial programme theory and its  
48 subsequent refinement. Stakeholder meetings will be convened every three months and will be used  
49 to develop the initial programme theory as well as refining the programme theory through the  
50 duration of the review. At the first meeting we shall seek to ascertain the stakeholders' broad  
51 perspectives on the review questions and their own experience of remediation. At subsequent  
52 meetings we shall present to them our emerging research findings, using their feedback to further  
53 refine the programme theory. In addition to supporting the research to develop and refine the  
54 programme theory, the stakeholder group will also have a role in aiding the dissemination of the  
55 review findings to achieve maximum impact.  
56  
57



## Step 2: Search strategy

### *Formal searches*

Conducting a realist review is an iterative process. An initial search strategy has been developed that will seek to catch all of the existing literature on the remediation of doctors to help inform the programme theory on how remediation is meant to work to produce improved performance in doctors. The search strategy has been developed and piloted with an information specialist (AW) who is part of the core research team. Initial search terms were developed and tested against a 'gold standard' set of representative articles identified by subject experts. The initial search has been designed to capture a broad range of literature: all articles or studies that report on the remediation (i.e. the remedy of identified underperformance) of practising doctors (i.e. medical professionals who have graduated from medical school and hold a licence to practice medicine). The search strategy will include:

- Searching electronic databases including using key word searches related to the remediation of practising doctors, including: Embase; MEDLINE; CINAHL, PsycINFO, ERIC, DARE, ASSIA, HMIC.
- Forward and backward citation of all articles that are included.
- Making contact with authors if necessary
- Searching the grey literature, particularly of those bodies that deliver or plan remediation interventions. Google, OpenGrey, and Health management Information Consortium (HMIC) will also be searched.

As the review progresses the searching will become more focused on key areas of the programme theory.

### *Additional searches*

A vital part of conducting a realist review involves searching for additional data to explain particular parts of the programme theory. Therefore, more searches will be conducted in any such identified areas as the review progresses. Based on our understanding of remediation to date, these could include areas like feedback on performance,<sup>25-27</sup> reflection,<sup>28 29</sup> and development of insight.<sup>30-33</sup> These additional topics will increase the quantity of relevant data available for us to test the programme theory. The searches will be developed, piloted and refined by the core research team with the help of the information specialist. These searches will differ from the 'formal searches' outlined above through being more exploratory and purposive, and will emanate from a range of different disciplines. Each additional search instigated, along with the inclusion and exclusion criteria, will be discussed by the core research team.

## Step 3: Study selection criteria and procedures

Our document selection process will be as follows. Screening of documents from our search(es) will be piloted with small samples being screened by two members of the research team (TP, NB), until high levels of agreement are reached. Full screening will be conducted by one member of the research team (TP). A random sample of 10% of the citations identified through the formal searches will be reviewed independently by NB for quality assurance purposes. Disagreement will be resolved through discussion with the whole research team.

Article selection is based on relevance, in other words the extent to which an article can contribute to the development of the programme theory.<sup>19 20</sup> Accordingly, at the initial stage of the review, we may include any documents that contain relevant data – e.g. original studies of different types, commentaries, systematic reviews, and grey literature reports and guidance documents.

#### Step 4: Extracting and organising data

The iterative process of realist reviewing dictates a different method for extracting data than is used in a more conventional systematic review, using note-taking and annotation as opposed to a standard data extraction form. Documents will be examined for data on how a remediation intervention is supposed to work. The synthesis of evidence will begin with conceptual coding using NVivo qualitative data management software.<sup>34</sup> As the review progresses, these conceptual codes will be analysed to develop Context-Mechanism-Outcome Configurations (see Step 5 below). Data on the characteristics of the documents will be extracted separately into an Excel spreadsheet. Data extraction will be carried out by TP.

#### Step 5: Data synthesis

Data analysis will involve the use of a realist logic analysis with the goal of using the data from the literature (i.e. sources) to further develop the initial programme theory. Analysis requires interpretation and judgement of data. Data coding will be deductive (informed by our initial programme theory), inductive (from the data within documents) and retroductive (where inferences are made based on interpretations of the data within documents about underlying causal processes – i.e. mechanisms). We shall use a series of questions about the relevance and rigour of content within sources as part of our process of analysis, as set out in Box 1.

Data to inform our interpretation of the relationships between contexts, mechanisms and outcomes will be sought not just within the same source, but across sources (e.g. mechanisms inferred from one source could help explain the way contexts influenced outcomes in a different source). Synthesising data from different sources is often necessary to compile CMOCs, since not all parts of the configurations will always be articulated in the same source.

Box 1: Data analysis in realist reviews, adapted from Papoutsis et al., 2017.<sup>1</sup>

Questions to guide data analysis in a realist review:

Relevance:

- Are there sections of text within this source that are relevant to programme theory development?

Rigour - judgements about trustworthiness:

- Are these data sufficiently trustworthy to warrant making changes (if needed) to any aspect of the programme theory?

Interpretation of meaning:

- If the section of text is relevant and trustworthy enough, do its contents provide data that may be interpreted as functioning as context, mechanism or outcome?

Interpretations and judgements about Context-Mechanism-Outcome-Configurations:

- For the data that have been interpreted as functioning as context, mechanism or outcome, which Context-Mechanism-Outcome-Configuration (CMOC) (partial or complete) does it belong to?

- Are there further data to inform this particular CMOCs contained within this source or other sources?

If so, in which other documents?

- How does this particular CMOC relate to other CMOCs that have already been developed?

Interpretations and judgements about programme theory:

- How does this particular (full or partial) CMOC relate to the programme theory?

- Within this same source are there data which informs how the CMOC relates to the programme theory? If not, are there data in other sources? Which ones?

- In light of this particular CMOC and any supporting data, does the programme theory need to be changed?

Within the analytic process set out in Box 1 above, we shall use interpretive cross-case comparison to understand and explain how and why observed outcomes have occurred, for example, by comparing interventions where remediation has been 'successful' against those which have not, to understand how context has influenced reported findings. When working through the questions set out, where appropriate we shall use the following forms of reasoning to make sense of the data:

- Juxtaposition of data: for example, where data about behaviour change in one source enable insights into data about outcomes in another source.

- Reconciling of data: where data differ in apparently similar circumstances, further investigation is appropriate in order to find explanations for why these differences have occurred.

- Adjudication of data: on the basis of methodological strengths or weaknesses.

- Consolidation of data: where outcomes differ in particular contexts, an explanation can be constructed of how and why these outcomes occur differently.

1  
2  
3 During the review, we shall move iteratively between the analysis of particular examples, refinement  
4 of the programme theory, and further iterative searching for data to test particular theories. The  
5 final realist programme theory will be presented in a diagram and through a narrative description of  
6 CMOCs.  
7  
8  
9

## 10 DISCUSSION

### 11 Importance of the research

12 The proposed research will make an empirical contribution to the existing body of knowledge by  
13 developing a transferable realist programme theory of how remediation of doctors works, for whom  
14 and in what contexts. Achieving this type of understanding will also enable us to develop  
15 recommendations to support the optimal tailoring, design and implementation of remediation  
16 interventions for underperforming doctors in order to support patient safety.  
17

18 This research will generate new knowledge about a poorly understood area of healthcare delivery  
19 that directly affects the standards of care received by patients. It is thus consistent with a focus on  
20 improving the quality and the organisation of health services, in this instance within the specific area  
21 of improving the design and delivery of remediation programmes.  
22

23 The research will be carried out with NCAS as a collaborative partner, and so will have a direct  
24 impact in terms of shaping NCAS remediation programmes in the United Kingdom. This  
25 collaboration, combined with expert input from our stakeholder group, will ensure that the study  
26 will deliver findings that will directly feed into policy and practice development and have  
27 international significance. The self-evident importance of doctor performance for patient safety, and  
28 the practical, moral, political and financial imperatives of offering underperforming doctors the  
29 opportunity to remediate, mean that this will be an area of sustained international interest in the  
30 area of health services research.  
31  
32

### 33 Dissemination

34 Our dissemination strategy will build on the participatory approach (involving stakeholders) that we  
35 shall develop throughout the preceding stages of the review. We shall work with the representatives  
36 from NCAS, who are part of the stakeholder group, to refine our dissemination strategy throughout  
37 the study. We shall also seek to engage with other audiences who have a stake in our research.  
38

39 This dissemination strategy will aim to have impact along three primary trajectories:  
40

41 *Instrumental impact:* The study will inform and develop the policy and practice of remediation. This  
42 refers to the findings of the review itself and our dissemination of review findings to key  
43 stakeholders such as NCAS and the GMC in order to provide tangible improvement to the practice of  
44 remediation in NHS organisations.  
45

46 *Conceptual impact:* The study will be the first of its kind to conduct a realist review of remediation  
47 and to develop a programme theory of remediation. The systematic reviews that exist on this topic  
48 are now dated (2009 and 2013); no one has, as yet, conducted a review of remediation to work out  
49 what works, for whom, how, why and in what contexts (i.e. a realist review) as proposed by Cleland  
50 et al in the later review.  
51

52 *Capacity building:* The networks that are developed through conducting and disseminating the  
53 research will enhance the collective technical expertise in the area for further research and  
54 development of remediation practices.  
55  
56  
57  
58  
59  
60

1  
2  
3 We want to ensure that the outputs of this project will be useful to the NHS. To do this we shall use  
4 the Knowledge-To-Action Cycle framework provided by the KT Clearinghouse.<sup>35</sup> This is a framework  
5 that provides knowledge translation resources funded by the Canadian Institute of Health Research.  
6 The Knowledge-to-Action Cycle graphically sets out the steps necessary in bridging the knowledge-  
7 to-action gap. Specifically, with input from our stakeholder group, this realist review will generate  
8 knowledge that will inform the following phases of the Knowledge-To-Action Cycle framework by:  
9 producing stakeholder relevant knowledge; adapting knowledge to local context; and assessing  
10 barriers to knowledge use.  
11

12  
13  
14 We shall seek to operationalise this framework by:  
15

16 **1) The findings from the review will be submitted for publication to a high-impact peer-reviewed**  
17 **journal**

18  
19 We anticipate that this publication is most likely to impact at an academic level – informing the  
20 understanding and theoretical basis of remediation behaviour change interventions.  
21

22 **2) A ‘user guide’ that outlines practical advice to optimise, tailor and implement existing**  
23 **interventions designed to change behaviour through remediation**

24  
25 With this output, we shall aim to impact on the landscape of current remediation provision. This  
26 document will be targeted at educational providers and regulators. These include medical schools,  
27 Local Education Training Boards and Deaneries, as well as Health Education England, NHS Education  
28 Scotland, the NHS, the GMC and NCAS. These bodies are at the delivery end of existing remediation  
29 practices that we wish to inform and help improve.  
30

31 We shall draw on the expertise of the academics and educators within our project team and  
32 combine this with the policy expertise of the wider stakeholder group to produce an accessible,  
33 relevant and practical guide. This will ensure that it can be used to bring about direct change in  
34 policy and remediation practice.  
35

36 **3) User-friendly summaries of the review findings that are tailored to the needs of interested**  
37 **audiences:**

38  
39 Stakeholders will be invited to attend presentations on the developing programme theory so that  
40 research dissemination can also benefit from their feedback and reflection. In addition to national  
41 and regional dissemination, research findings will be presented locally and internationally. Locally,  
42 we shall continue to work with researchers across Plymouth through CAMERA’s monthly meetings to  
43 share and promote research. At an international level, our established networks in North America  
44 and Australasia will continue, allowing international comparisons between practice in the UK and  
45 systems for remediating poor performance around the world.  
46

47 To support PPI beyond the stakeholder group, the research will be summarised in a newly developed  
48 website.<sup>36</sup>  
49  
50  
51  
52  
53  
54  
55  
56  
57  
58  
59  
60

### **Ethics**

As this is a review of existing literature, no ethical approval is needed.

### **Contributors**

JA conceptualised the study with input from TP. NB led the development of the protocol with input from JA, TP, GW, LP-C, JC, AW, LW. AW scoped and designed the search strategy. Methodological advice was given by GW and NB. TP wrote the first draft of this manuscript. JA, NB, GW, LP-C, JC, AW, LW critically reviewed it and provided comments for improvement.

### **Funding acknowledgement**

This project was funded by the NIHR Health Services and Delivery Research Programme (HS&DR 17/06/04)

This research is also supported by the National Institute for Health Research Collaboration for Leadership in Applied Health Research and Care South West Peninsula (NIHR CLAHRC South West Peninsula).

GW's salary is partly supported by The Evidence Synthesis Working Group of the National Institute for Health Research School for Primary Care Research (NIHR SPCR) [Project Number 390].

### **Department of Health and Social Care disclaimer**

The views expressed are those of the author(s) and not necessarily those of the NHS, the NIHR or the Department of Health and Social Care.

### **Competing interests**

None

## REFERENCES

1. Papoutsi C, Mattick K, Pearson M, et al. Social and professional influences on antimicrobial prescribing for doctors-in-training: a realist review. *Journal of Antimicrobial Chemotherapy* 2017;72(9):2418-30. doi: 10.1093/jac/dkx194
2. Hogan H, Healey F, Neale G, et al. Preventable deaths due to problems in care in English acute hospitals: a retrospective case record review study. *BMJ quality & safety* 2012;bmjqs-2012-001159.
3. Cox J, King J, Hutchinson A, et al. Understanding doctors' performance: Radcliffe Publishing 2006.
4. Kalet A, Chou CL, Ellaway RH. To fail is human: remediating remediation in medical education. *Perspectives on Medical Education* 2017;6(6):418-24.
5. Kalet A, Chou CL. Remediation in medical education: Springer 2014.
6. Prescott-Clements L, Voller V, Bell M, et al. Rethinking Remediation: A Model to Support the Detailed Diagnosis of Clinicians' Performance Problems and the Development of Effective Remediation Plans. *Journal of Continuing Education in the Health Professions* 2017;37(4):245-54.
7. Goulet F, Thiffault J, Ladouceur R. Remediation and rehabilitation programmes for health professionals: challenges for the future. *BMJ Quality & Safety* 2017;26(12):941.
8. Kalet A, Guerrasio J, Chou CL. Twelve tips for developing and maintaining a remediation program in medical education. *Medical Teacher* 2016;38(8):787-92. doi: 10.3109/0142159X.2016.1150983
9. Cohen D, Rhydderch M, Cooper I. Managing remediation. In: Swanwick T, ed. *Understanding Medical Education: Evidence, Theory and Practice*. Chichester Wiley Blackwell 2014:366-78.
10. Price T, Archer J. UK Policy on Doctor Remediation: Trajectories and Challenges. *Journal of Continuing Education in the Health Professions* 2017;37(3):207-11.
11. Personal Social Services Research Unit. Unit Costs of Health and Social Care. In: Curtis L, ed.: *Personal Social Services Research Unit (PSSRU), 2012*.
12. NHS Litigation Authority. *NHS Litigation Authority: Annual report and accounts 2015/16, 2016*.
13. General Medical Council. *The state of medical education and practice in the UK 2017*. London, 2017.
14. Crisp N, Chen L. Global supply of health professionals. *New England Journal of Medicine* 2014;370(10):950-57.
15. Zurn P, Dal Poz MR, Stilwell B, et al. Imbalance in the health workforce. *Human Resources for Health* 2004;2(1):13. doi: 10.1186/1478-4491-2-13
16. Hauer KE, Ciccone A, Henzel TR, et al. Remediation of the deficiencies of physicians across the continuum from medical school to practice: a thematic review of the literature. *Academic Medicine* 2009;84(12):1822-32.
17. Cleland J, Leggett H, Sandars J, et al. The remediation challenge: theoretical and methodological insights from a systematic review. *Medical education* 2013;47(3):242-51.
18. Bourgeois-Law G, Teunissen PW, Regehr G. Remediation in Practicing Physicians: Current and Alternative Conceptualizations. *Academic Medicine* 2018;Publish Ahead of Print doi: 10.1097/acm.0000000000002266
19. Wong G, Greenhalgh T, Westhorp G, et al. Realist methods in medical education research: what are they and what can they contribute? *Medical Education* 2012;46(1):89-96.
20. Wong G, Greenhalgh T, Westhorp G, et al. Development of methodological guidance, publication standards and training materials for realist and meta-narrative reviews: the RAMESSES (Realist And Meta-narrative Evidence Syntheses - Evolving Standards). *BMC Med* 2013;11(21)
21. Pawson R, Tilley N. *Realistic evaluation*: Sage 1997.
22. Pawson R, Greenhalgh T, Harvey G, et al. Realist review—a new method of systematic review designed for complex policy interventions. *Journal of health services research & policy* 2005;10(suppl 1):21-34.

- 1  
2  
3 23. Wong G, Greenhalgh T, Westhorp G, et al. Development of methodological guidance, publication  
4 standards and training materials for realist and meta-narrative reviews: the RAMESES  
5 (Realist And Meta-narrative Evidence Syntheses–Evolving Standards) project. *Health Services  
6 and Delivery Research* 2014;2(30)
- 7 24. Moher D, Shamseer L, Clarke M, et al. Preferred reporting items for systematic review and meta-  
8 analysis protocols (PRISMA-P) 2015 statement. *Systematic reviews* 2015;4(1):1.
- 9 25. Aeder L, Fogel J, Schaeffer H. Pediatric board review course for residents “at risk”. *Clinical  
10 pediatrics* 2010;49(5):450-56.
- 11 26. Borman KR. Does academic intervention impact ABS qualifying examination results? *Current  
12 surgery* 2006;63(6):367-72.
- 13 27. Brooks R, Robb A, Tabak D. A remedial course on interviewing skills. *Academic Medicine*  
14 1996;71(5):560.
- 15 28. Kern DE, Wright SM, Carrese JA, et al. Personal growth in medical faculty: a qualitative study.  
16 *Western Journal of Medicine* 2001;175(2):92.
- 17 29. Levine RB, Haidet P, Kern DE, et al. Personal growth during internship: A qualitative analysis of  
18 interns' responses to key questions. *Journal of general internal medicine* 2006;21(6):564-69.
- 19 30. Grol R. Changing physicians' competence and performance: finding the balance between the  
20 individual and the organization. *Journal of Continuing Education in the Health Professions*  
21 2002;22(4):244-51.
- 22 31. Hays RB, Jolly B, Caldon L, et al. Is insight important? Measuring capacity to change performance.  
23 *Medical education* 2002;36(10):965-71.
- 24 32. Ehrlinger J, Johnson K, Banner M, et al. Why the unskilled are unaware: Further explorations of  
25 (absent) self-insight among the incompetent. *Organizational behavior and human decision  
26 processes* 2008;105(1):98-121.
- 27 33. Kruger J, Dunning D. Unskilled and unaware of it: how difficulties in recognizing one's own  
28 incompetence lead to inflated self-assessments. *Journal of personality and social psychology*  
29 1999;77(6):1121.
- 30 34. International Q. NVivo qualitative data analysis software. Version 11, 2015.
- 31 35. KT Clearinghouse. KT Tools [cited 2018. Available from: [https://knowledgetranslation.net/kt-  
32 tools/2018](https://knowledgetranslation.net/kt-tools/2018).
- 33 36. RESTORE. Realist Synthesis of Doctor Remediation [Available from:  
34 [https://www.plymouth.ac.uk/your-university/about-us/university-  
37 structure/faculties/medicine-dentistry/pupsm-d-research/camera/realist-synthesis-of-  
38 doctor-remediation-restore](https://www.plymouth.ac.uk/your-university/about-us/university-<br/>35 structure/faculties/medicine-dentistry/pupsm-d-research/camera/realist-synthesis-of-<br/>36 doctor-remediation-restore).
- 39  
40  
41  
42  
43  
44  
45  
46  
47  
48  
49  
50  
51  
52  
53  
54  
55  
56  
57  
58  
59  
60



# Reporting checklist for protocol of a systematic review.

|                           |                     | Reporting Item                                                                                                                                                                                  | Page Number                                      |
|---------------------------|---------------------|-------------------------------------------------------------------------------------------------------------------------------------------------------------------------------------------------|--------------------------------------------------|
| Identification            | <a href="#">#1a</a> | Identify the report as a protocol of a systematic review                                                                                                                                        | 1                                                |
| Update                    | <a href="#">#1b</a> | If the protocol is for an update of a previous systematic review, identify as such                                                                                                              | n/a not an update                                |
|                           | <a href="#">#2</a>  | If registered, provide the name of the registry (such as PROSPERO) and registration number                                                                                                      | 1                                                |
| Contact                   | <a href="#">#3a</a> | Provide name, institutional affiliation, e-mail address of all protocol authors; provide physical mailing address of corresponding author                                                       | 1                                                |
| Contribution              | <a href="#">#3b</a> | Describe contributions of protocol authors and identify the guarantor of the review                                                                                                             | 11                                               |
|                           | <a href="#">#4</a>  | If the protocol represents an amendment of a previously completed or published protocol, identify as such and list changes; otherwise, state plan for documenting important protocol amendments | n/a not an amended protocol                      |
| Sources                   | <a href="#">#5a</a> | Indicate sources of financial or other support for the review                                                                                                                                   | 11                                               |
| Sponsor                   | <a href="#">#5b</a> | Provide name for the review funder and / or sponsor                                                                                                                                             | 11                                               |
| Role of sponsor or funder | <a href="#">#5c</a> | Describe roles of funder(s), sponsor(s), and / or institution(s), if any, in developing the protocol                                                                                            | n/a, funders had no role in protocol development |
| Rationale                 | <a href="#">#6</a>  | Describe the rationale for the review in the                                                                                                                                                    | 3-4                                              |

|    |                      |                                                                       |                               |
|----|----------------------|-----------------------------------------------------------------------|-------------------------------|
| 1  |                      | context of what is already known                                      |                               |
| 2  | Objectives           | <a href="#">#7</a> Provide an explicit statement of the               | 4                             |
| 3  |                      | question(s) the review will address with                              |                               |
| 4  |                      | reference to participants, interventions,                             |                               |
| 5  |                      | comparators, and outcomes (PICO)                                      |                               |
| 6  |                      |                                                                       |                               |
| 7  |                      |                                                                       |                               |
| 8  |                      |                                                                       |                               |
| 9  | Eligibility criteria | <a href="#">#8</a> Specify the study characteristics (such as         | 6-7                           |
| 10 |                      | PICO, study design, setting, time frame) and                          |                               |
| 11 |                      | report characteristics (such as years                                 |                               |
| 12 |                      | considered, language, publication status) to be                       |                               |
| 13 |                      | used as criteria for eligibility for the review                       |                               |
| 14 |                      |                                                                       |                               |
| 15 |                      |                                                                       |                               |
| 16 |                      |                                                                       |                               |
| 17 | Information          | <a href="#">#9</a> Describe all intended information sources          | 6-7                           |
| 18 | sources              | (such as electronic databases, contact with                           |                               |
| 19 |                      | study authors, trial registers or other grey                          |                               |
| 20 |                      | literature sources) with planned dates of                             |                               |
| 21 |                      | coverage                                                              |                               |
| 22 |                      |                                                                       |                               |
| 23 |                      |                                                                       |                               |
| 24 |                      |                                                                       |                               |
| 25 |                      |                                                                       |                               |
| 26 | Search strategy      | <a href="#">#10</a> Present draft of search strategy to be used for   | 6-7                           |
| 27 |                      | at least one electronic database, including                           |                               |
| 28 |                      | planned limits, such that it could be repeated                        |                               |
| 29 |                      |                                                                       |                               |
| 30 |                      |                                                                       |                               |
| 31 | Study records -      | <a href="#">#11a</a> Describe the mechanism(s) that will be used      | 6-7                           |
| 32 | data                 | to manage records and data throughout the                             |                               |
| 33 | management           | review                                                                |                               |
| 34 |                      |                                                                       |                               |
| 35 |                      |                                                                       |                               |
| 36 | Study records -      | <a href="#">#11b</a> State the process that will be used for          | 6-7                           |
| 37 | selection            | selecting studies (such as two independent                            |                               |
| 38 | process              | reviewers) through each phase of the review                           |                               |
| 39 |                      | (that is, screening, eligibility and inclusion in                     |                               |
| 40 |                      | meta-analysis)                                                        |                               |
| 41 |                      |                                                                       |                               |
| 42 |                      |                                                                       |                               |
| 43 |                      |                                                                       |                               |
| 44 |                      |                                                                       |                               |
| 45 | Study records -      | <a href="#">#11c</a> Describe planned method of extracting data       | 6-7                           |
| 46 | data collection      | from reports (such as piloting forms, done                            |                               |
| 47 | process              | independently, in duplicate), any processes for                       |                               |
| 48 |                      | obtaining and confirming data from                                    |                               |
| 49 |                      | investigators                                                         |                               |
| 50 |                      |                                                                       |                               |
| 51 |                      |                                                                       |                               |
| 52 |                      |                                                                       |                               |
| 53 | Data items           | <a href="#">#12</a> List and define all variables for which data will | n/a, this is a realist review |
| 54 |                      | be sought (such as PICO items, funding                                |                               |
| 55 |                      | sources), any pre-planned data assumptions                            |                               |
| 56 |                      | and simplifications                                                   |                               |
| 57 |                      |                                                                       |                               |
| 58 |                      |                                                                       |                               |
| 59 |                      |                                                                       |                               |
| 60 |                      |                                                                       |                               |

|    |                 |                      |                                                          |                             |
|----|-----------------|----------------------|----------------------------------------------------------|-----------------------------|
| 1  | Outcomes and    | <a href="#">#13</a>  | List and define all outcomes for which data will         | n/a, the realist review     |
| 2  | prioritization  |                      | be sought, including prioritization of main and          | method does not specify     |
| 3  |                 |                      | additional outcomes, with rationale                      | outcomes.                   |
| 4  |                 |                      |                                                          |                             |
| 5  |                 |                      |                                                          |                             |
| 6  | Risk of bias in | <a href="#">#14</a>  | Describe anticipated methods for assessing               | n/a, realist methods would  |
| 7  | individual      |                      | risk of bias of individual studies, including            | not assess risk of bias     |
| 8  | studies         |                      | whether this will be done at the outcome or              | explicitly. However, rigor  |
| 9  |                 |                      | study level, or both; state how this information         | is important, see page 8.   |
| 10 |                 |                      | will be used in data synthesis                           |                             |
| 11 |                 |                      |                                                          |                             |
| 12 |                 |                      |                                                          |                             |
| 13 |                 |                      |                                                          |                             |
| 14 | Data synthesis  | <a href="#">#15a</a> | Describe criteria under which study data will            | n/a, not a quantitative     |
| 15 |                 |                      | be quantitatively synthesised                            | synthesis                   |
| 16 |                 |                      |                                                          |                             |
| 17 |                 |                      |                                                          |                             |
| 18 |                 | <a href="#">#15b</a> | If data are appropriate for quantitative                 | n/a, as above               |
| 19 |                 |                      | synthesis, describe planned summary                      |                             |
| 20 |                 |                      | measures, methods of handling data and                   |                             |
| 21 |                 |                      | methods of combining data from studies,                  |                             |
| 22 |                 |                      | including any planned exploration of                     |                             |
| 23 |                 |                      | consistency (such as I <sup>2</sup> , Kendall's $\tau$ ) |                             |
| 24 |                 |                      |                                                          |                             |
| 25 |                 |                      |                                                          |                             |
| 26 |                 |                      |                                                          |                             |
| 27 |                 |                      |                                                          |                             |
| 28 |                 | <a href="#">#15c</a> | Describe any proposed additional analyses                | 7-8                         |
| 29 |                 |                      | (such as sensitivity or subgroup analyses,               |                             |
| 30 |                 |                      | meta-regression)                                         |                             |
| 31 |                 |                      |                                                          |                             |
| 32 |                 |                      |                                                          |                             |
| 33 |                 |                      |                                                          |                             |
| 34 |                 | <a href="#">#15d</a> | If quantitative synthesis is not appropriate,            | 7-8                         |
| 35 |                 |                      | describe the type of summary planned                     |                             |
| 36 |                 |                      |                                                          |                             |
| 37 | Meta-bias(es)   | <a href="#">#16</a>  | Specify any planned assessment of meta-                  | n/a, again, realist methods |
| 38 |                 |                      | bias(es) (such as publication bias across                | would not assess risk of    |
| 39 |                 |                      | studies, selective reporting within studies)             | bias explicitly. However,   |
| 40 |                 |                      |                                                          | rigor is important, see     |
| 41 |                 |                      |                                                          | page 8.                     |
| 42 |                 |                      |                                                          |                             |
| 43 |                 |                      |                                                          |                             |
| 44 |                 |                      |                                                          |                             |
| 45 | Confidence in   | <a href="#">#17</a>  | Describe how the strength of the body of                 | 7-8                         |
| 46 | cumulative      |                      | evidence will be assessed (such as GRADE)                |                             |
| 47 | evidence        |                      |                                                          |                             |
| 48 |                 |                      |                                                          |                             |
| 49 |                 |                      |                                                          |                             |
| 50 |                 |                      |                                                          |                             |

The PRISMA-P checklist is distributed under the terms of the Creative Commons Attribution License CC-BY 4.0. This checklist can be completed online using <https://www.goodreports.org/>, a tool made by the [EQUATOR Network](#) in collaboration with [Penelope.ai](#)

# BMJ Open

## Remediating doctors' performance to restore patient safety: A realist review protocol

|                                 |                                                                                                                                                                                                                                                                                                                                                                                                                                                                                                                                                                                                                                                                                                                                 |
|---------------------------------|---------------------------------------------------------------------------------------------------------------------------------------------------------------------------------------------------------------------------------------------------------------------------------------------------------------------------------------------------------------------------------------------------------------------------------------------------------------------------------------------------------------------------------------------------------------------------------------------------------------------------------------------------------------------------------------------------------------------------------|
| Journal:                        | <i>BMJ Open</i>                                                                                                                                                                                                                                                                                                                                                                                                                                                                                                                                                                                                                                                                                                                 |
| Manuscript ID                   | bmjopen-2018-025943.R1                                                                                                                                                                                                                                                                                                                                                                                                                                                                                                                                                                                                                                                                                                          |
| Article Type:                   | Protocol                                                                                                                                                                                                                                                                                                                                                                                                                                                                                                                                                                                                                                                                                                                        |
| Date Submitted by the Author:   | 31-Aug-2018                                                                                                                                                                                                                                                                                                                                                                                                                                                                                                                                                                                                                                                                                                                     |
| Complete List of Authors:       | Price, Tristan; University of Plymouth, Faculty of Medicine and Dentistry<br>Brennan, Nicola; University of Plymouth, Faculty of Medicine and Dentistry<br>Cleland, Jennifer; University of Aberdeen, Centre for Healthcare Education Research and Innovation (CHERI)<br>Prescott-Clements, Linda; National Clinical Assessment Service<br>Wanner, Amanda ; University of Plymouth, NIHR Collaboration for Leadership in Applied Health Research and Care South West Peninsula (PenCLAHRC)<br>Withers, Lyndsey; University of Plymouth, Patient Partner<br>Wong, Geoff; University of Oxford, Nuffield Department of Primary Care, Health Sciences<br>Archer, Julian; University of Plymouth, Faculty of Medicine and Dentistry |
| <b>Primary Subject Heading</b>: | Medical education and training                                                                                                                                                                                                                                                                                                                                                                                                                                                                                                                                                                                                                                                                                                  |
| Secondary Subject Heading:      | Qualitative research, Research methods                                                                                                                                                                                                                                                                                                                                                                                                                                                                                                                                                                                                                                                                                          |
| Keywords:                       | MEDICAL EDUCATION & TRAINING, REMEDIATION, MEDICAL PERFORMANCE, PATIENT SAFETY                                                                                                                                                                                                                                                                                                                                                                                                                                                                                                                                                                                                                                                  |
|                                 |                                                                                                                                                                                                                                                                                                                                                                                                                                                                                                                                                                                                                                                                                                                                 |

SCHOLARONE™  
Manuscripts

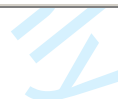

1  
2  
3  
4  
5 **TITLE:** Remediating doctors' performance to restore patient  
6 safety: A realist review protocol  
7  
8  
9

10  
11 **DURATION:** 18 months, started on 1<sup>st</sup> April 2018.  
12  
13

14 **AUTHORS:**  
15

16 Dr Tristan Price, Research Fellow in the Collaboration for the Advancement of Medical Education  
17 Research and Assessment, Faculty of Medicine and Dentistry, University of Plymouth  
18 tristan.price@plymouth.ac.uk,  
19

20 Dr Nicola Brennan, Research Fellow in the Collaboration for the Advancement of Medical Education  
21 Research and Assessment, Faculty of Medicine and Dentistry, University of Plymouth,  
22 nicola.brennan@plymouth.ac.uk  
23

24 Professor Jennifer Cleland, Institute of Education for Medical and Dental Sciences, School of  
25 Medicine, Dentistry and Nutrition, University of Aberdeen, jen.cleland@abdn.ac.uk  
26

27 Dr Linda Prescott-Clements, Lead Assessment & Intervention Adviser, NCAS (now within NHS  
28 Resolution), Linda.Prescott-Clements@ncas.nhs.uk  
29

30 Amanda Wanner, Information Specialist/Research Fellow, NIHR Collaboration for Leadership in  
31 Applied Health Research and Care South West Peninsula (PenCLAHRC), Community and Primary Care  
32 Research Group, University of Plymouth, amanda.wanner@plymouth.ac.uk  
33

34 Dr Lyndsey Withers, Patient Partner, University of Plymouth, lyndsey.withers@btinternet.com  
35

36 Dr Geoff Wong, Nuffield Department of Primary Care, Health Sciences, University of Oxford,  
37 grckwong@gmail.com  
38

39 Professor Julian Archer (corresponding), Faculty of Medicine and Dentistry, University of Plymouth,  
40 PL4 8AA, julian.archer@plymouth.ac.uk  
41  
42  
43  
44  
45  
46  
47  
48  
49  
50  
51  
52  
53  
54  
55  
56  
57  
58  
59  
60

## ABSTRACT

### Introduction:

Underperformance by doctors poses a risk to patient safety. Remediation is an intervention designed to remedy underperformance and return a doctor to safe practice. Remediation is widely used across healthcare systems globally, and is self-evidently important in terms of patient safety and doctor retention. Yet there is a poor evidence base to inform remediation programmes. In particular, there is a lack of understanding as to why and how a remedial intervention may work to change a doctor's practice. The aim of this research is to identify why, how, in what contexts, for whom and to what extent remediation programmes for practising doctors work to support patient safety.

### Methods and analysis:

Realist review is an approach to evidence synthesis that seeks to develop programme theories about how an intervention works to produce its effects. The initial search strategy will involve: database and grey literature searching, citation searching, and contacting authors. The evidence search will be extended as the review progresses and becomes more focused on the development of specific aspects of the programme theory. The development of the programme theory will involve input from a stakeholder group consisting of professional experts in the remediation process and patient representatives. Evidence synthesis will use a realist logic of analysis to interrogate data in order to develop and refine the initial programme theory into a more definitive realist programme theory of how remediation works. The study will follow and be reported according to RAMESES standards.

### Ethics and dissemination:

Ethical approval is not required. Our dissemination strategy will include input from our stakeholder group. Customised outputs will be developed using the Knowledge-To-Action Cycle framework, and will be targeted to: policy makers; education providers and regulators, the NHS, doctors and academics.

### Trial registration number:

The protocol is registered with PROSPERO 2018 CRD42018088779

## Article summary: strengths and limitations

### Strengths

- The first realist review of doctor remediation.
- A realist methodology that will address the question of why, how, in what contexts, for whom and to what extent remediation programmes for practising doctors work to restore patient safety.
- Meaningful stakeholder input, including patient and public involvement (PPI), throughout the review will support the development and dissemination of contextually sensitive strategies for remediating underperformance in medicine.

### Limitations

- Based on secondary data generated from existing literature, therefore is limited by existing literature and its quality.

## INTRODUCTION AND BACKGROUND

The real human cost of medical underperformance is difficult to measure, but it is estimated that nearly 12,000 patients die in England each year as a result of preventable medical errors.<sup>1</sup> Yet the true societal costs when things go wrong are unknown. Incompetent doctors (of which there are relatively few) need to be stopped from practising; but there is a wider and harder problem to solve that will improve medical practice: doctors who underperform.

Doctors can experience performance issues at any stage in their careers and for many different reasons. Performance concerns are often complex, involving multifactorial issues encompassing knowledge, skills and professional behaviours.<sup>2-4</sup> To ensure patient safety, it is vital that if there are questions about the performance of a doctor they are identified quickly and, where appropriate, support is provided for the practitioner through remediation.<sup>5-7</sup>

Remediation is an intervention, or a range of interventions, that seek to return a doctor to safe practice in response to identified underperformance.<sup>8,9</sup> Not only is remedying underperformance a matter of patient safety, but is also both a practical and a financial imperative. In the UK, it is estimated that it costs around £250,000 to train a doctor to the point of graduation from medical school, rising to £500,000 at the point when a doctor completes specialty training.<sup>10</sup> Added to this is the cost of litigation; the NHS paid out more than £1.4 billion in medical negligence claims in 2015/16 alone, up from £1.2 billion the year before.<sup>11</sup> Moreover, in the UK, the number of doctors entering the profession is not keeping pace with projected levels of demand, particularly in certain specialties (GPs, Psychiatrists and specialists in long term conditions) and in particular geographical locations.<sup>12</sup> This trend towards an imbalance in the medical workforce is global in scope and exists across developing and developed countries.<sup>13,14</sup> Given that recruiting and training a sufficient supply of qualified doctors, within the necessary specialties, is a huge investment for any healthcare system, remedying underperformance where possible will be an important component of a sustainable healthcare policy.

Despite the importance of remediation and its prevalence across healthcare systems globally, relatively little is known about how it works and the extent to which it works. A 2009 systematic review by Hauer et al. on the remediation of practising doctors reported that there is “surprisingly little evidence to guide remediation in medical education at all levels”.<sup>15 p.1827</sup> A more recent systematic review by Cleland et al. in 2013, on the remediation of medical students and doctors in training, found that “rigorous approaches to developing and evaluating remediation interventions are required”.<sup>16 p.242</sup> The Cleland et al. review also found that few of the studies that were included reported having informed their approaches with relevant theory.

A further weakness with the existing evidence base for remediation is that it does not sufficiently inform the development of remediation programmes. As noted by Cleland et al., “we do not know what types of support work, or how much extra teaching is critical... we cannot delineate precisely what works, and why, in remedial interventions”.<sup>16 p.248</sup> In other words, in order to design high-quality remediation interventions, it is fundamental to understand how the remediation of doctors is supposed to work, for whom, and the contexts that lead to different outcomes.

Remediation covers a broad array of interventions, occurs across a range regulatory jurisdictions, in different settings within those jurisdictions, and at different stages of a doctor’s career. As such, there is a clear need for research that builds theoretically rich explanations of how remediation works, and does so in such a way that is appreciative of the varying circumstances in which

remediation occurs.<sup>17</sup> Theory-led research is important because it is able to deliver findings at a level of abstraction whereby they are transferable to a range of interventions, while being close enough to actual practice to be relevant to those who plan and deliver remedial interventions.<sup>18</sup>

## METHODS AND ANALYSIS

### Research questions

The overarching aim of this research is to identify how and why remediation interventions work to improve the performance of doctors. Central to realist methodology (described below) is an acknowledgement that the contexts surrounding a remedial intervention, and the way in which a remedial intervention changes the context, will determine the success or otherwise of a remedial programme. Accordingly, the main research question guiding this review is:

Why, how, in what contexts, for whom and to what extent do remediation programmes for practising doctors work to support patient safety?

This research question is operationalised into two main objectives:

1. To conduct a realist review of the literature to ascertain why, how, in what contexts, for whom and to what extent do remediation programmes for practising doctors work to support patient safety.
2. To provide recommendations on tailoring, implementation and design strategies to improve remediation interventions for doctors.

### Realist review

The research question will be addressed by using a realist approach to evidence synthesis, also known as a realist review. A realist review is rooted in the philosophy of realism and seeks to develop theories about how an intervention works to produce its effects. Central to the realist review approach is the generative model of causality which holds that to infer a causal outcome between any two events requires an understanding of the “causal mechanisms (M) that connect them and the context in which relationships occur”.<sup>19</sup> Essentially, this means developing and then interrogating a theory, or theories, about how remediation interventions work.

The context in which an intervention occurs is central to a realist explanation of how that intervention works to produce its effects. Context may relate to the specific structures or the environment surrounding an intervention, or to characteristics of those individuals delivering or receiving the intervention.<sup>19</sup> However, the realist approach seeks not to simply list all the contextual factors surrounding an intervention, but to establish which of the contextual factors are necessary to explain how the intervention produces the outcome. That is where the concept of the mechanism comes into play. Mechanisms are the way in which a programme’s resources or opportunities interact with the reasoning of individuals and lead to changes in behaviour. Mechanisms are usually hidden in that they are often not labelled as an official component of the programme, but can be deduced through research into how those types of programme work for particular people in particular circumstances to produce the desired outcome.<sup>20</sup>

A key part of the realist review approach is developing a programme theory, or theories. A programme theory is a description and/or a diagram that depicts how the intervention is supposed to work to produce its effects. Any programme theories developed should be specified at the



1  
2  
3 middle-range level of abstraction – in other words specified in such a way that permits them to be  
4 ‘tested’ against the empirical data from documents included in the realist review. Importantly, a  
5 realist review starts and ends with a programme theory; the programme theory is developed,  
6 interrogated and refined through an iterative process of collecting and analysing data from a variety  
7 of sources.  
8

9 Realist reviews are, therefore, particularly suited to understanding complex and multifaceted  
10 interventions like remediation, where a variety of approaches are employed within different  
11 contexts.  
12

### 13 **Study design**

14 Pawson has developed five practical steps to conduct realist reviews that will guide the research  
15 process in this study.<sup>21</sup> It is important to note that although these stages are numbered sequentially,  
16 realist reviews are iterative by nature and therefore there will be some movement between stages  
17 as the research progresses. The study findings will be written up according to the RAMESES quality  
18 and publication standards.<sup>22</sup> This protocol is reported according to PRISMA-P guidelines.<sup>23</sup>  
19

#### 20 **Step 1: Locate existing theories**

21  
22 This stage involves identifying the existing theories that explain how remediation is supposed to  
23 work. To identify these theories, we shall search relevant personal libraries of members of the  
24 review team. The research fellow (TP) will also undertake informal searches of the existing literature,  
25 informed by previous research into remediation undertaken by members of the review team (TP, JA,  
26 NB, JC) to develop the funding application for this review. We shall also iteratively consult with  
27 recognised experts in the remediation field, some of whom are co-applicants on this review (JC, LP-  
28 C), and others with whom we collaborate. In addition, we shall undertake relatively open searches of  
29 databases such as Google Scholar using keywords such as ‘remediation’. The initial programme  
30 theory will be developed by TP through identifying some of the key activities that occur in  
31 remediation programmes and any existing explanations of how such activities work to bring about  
32 changes in doctor performance related to areas such as knowledge, skills, attitudes, professional  
33 behaviours or the workplace environment.  
34

35  
36 We have established a stakeholder group to help develop the initial programme theory and refine  
37 the theory as the review progresses. The stakeholder group is comprised of a variety of professionals  
38 working within medicine (including doctors who have undergone remediation) and non-clinicians  
39 within clinical settings, representatives from doctor and patient groups, the medical regulator (the  
40 General Medical Council), and the National Clinical Assessment Service (NCAS). NCAS is an important  
41 collaborator in this review as they are the NHS body that provides advice, support and assessment  
42 services to help resolve concerns about the professional practice of doctors in the UK (as well as  
43 dentists and pharmacists).  
44

45  
46 The stakeholder group will assist with the development of the initial programme theory and its  
47 subsequent refinement. Stakeholder meetings will be convened every three months and will be used  
48 to develop the initial programme theory as well as refining the programme theory through the  
49 duration of the review. At the first meeting we shall seek to ascertain the stakeholders’ broad  
50 perspectives on the review questions and their own experience of remediation. At subsequent  
51 meetings we shall present to them our emerging research findings, using their feedback to further  
52 refine the programme theory. In addition to supporting the research to develop and refine the  
53 programme theory, the stakeholder group will also have a role in aiding the dissemination of the  
54 review findings to achieve maximum impact.  
55  
56  
57

## Step 2: Search strategy

### *Formal searches*

Conducting a realist review is an iterative process. An initial search strategy has been developed that will seek to catch all of the existing literature on the remediation of doctors to help inform the programme theory on how remediation is meant to work to produce improved performance in doctors. The search strategy has been developed and piloted with an information specialist (AW) who is part of the core research team. Initial search terms were developed and tested against a 'gold standard' set of representative articles identified by subject experts. The initial search has been designed to capture a broad range of literature: all articles or studies that report on the remediation (i.e. the remedy of identified underperformance) of practising doctors (i.e. medical professionals who have graduated from medical school and hold a licence to practice medicine). The search strategy will include:

- Searching electronic databases including using key word searches related to the remediation of practising doctors, including: Embase; MEDLINE; CINAHL, PsycINFO, ERIC, DARE, ASSIA, HMIC.
- Forward and backward citation searches of all articles that are included.
- Making contact with authors if necessary
- Searching the grey literature, particularly of those bodies that deliver or plan remediation interventions. Google, OpenGrey, and Health management Information Consortium (HMIC) will also be searched.

As the review progresses the searching will become more focused on key areas of the programme theory.

### *Additional searches*

A vital part of conducting a realist review involves searching for additional data to explain particular parts of the programme theory. Therefore, more searches will be conducted in any such identified areas as the review progresses. Based on our understanding of remediation to date, these could include areas like feedback on performance,<sup>24-26</sup> reflection,<sup>27 28</sup> and development of insight.<sup>29-32</sup> These additional topics will increase the quantity of relevant data available for us to test the programme theory. The searches will be developed, piloted and refined by the core research team with the help of the information specialist. These searches will differ from the 'formal searches' outlined above through being more exploratory and purposive, and will emanate from a range of different disciplines. Each additional search instigated, along with the inclusion and exclusion criteria, will be discussed by the core research team.

## Step 3: Study selection criteria and procedures

Our document selection process will be as follows. Screening of documents from our search(es) will be piloted with small samples being screened by two members of the research team (TP, NB), until high levels of agreement are reached. Full screening will be conducted by one member of the research team (TP). A random sample of 10% of the citations identified through the formal searches will be reviewed independently by NB for quality assurance purposes. Disagreement will be resolved through discussion with the whole research team.

Article selection is based on relevance, in other words the extent to which an article can contribute to the development of the programme theory.<sup>18 19</sup> Accordingly, at the initial stage of the review, we may include any documents that contain relevant data – e.g. original studies of different types, commentaries, systematic reviews, and grey literature reports and guidance documents.

#### Step 4: Extracting and organising data

The iterative process of realist reviewing dictates a different method for extracting data than is used in a more conventional systematic review, using note-taking and annotation as opposed to a standard data extraction form. Documents will be examined for data on how a remediation intervention is supposed to work. The synthesis of evidence will begin with conceptual coding using NVivo qualitative data management software.<sup>33</sup> As the review progresses, these conceptual codes will be analysed to develop Context-Mechanism-Outcome Configurations (see Step 5 below). Data on the characteristics of the documents will be extracted separately into an Excel spreadsheet. Data extraction will be carried out by TP.

#### Step 5: Data synthesis

Data analysis will involve the use of a realist logic analysis with the goal of using the data from the literature (i.e. sources) to further develop the initial programme theory. Analysis requires interpretation and judgement of data. Data coding will be deductive (informed by our initial programme theory), inductive (from the data within documents) and retroductive (where inferences are made based on interpretations of the data within documents about underlying causal processes – i.e. mechanisms). We shall use a series of questions about the relevance and rigour of content within sources as part of our process of analysis, as set out in Box 1.

Data to inform our interpretation of the relationships between contexts, mechanisms and outcomes will be sought not just within the same source, but across sources (e.g. mechanisms inferred from one source could help explain the way contexts influenced outcomes in a different source). Synthesising data from different sources is often necessary to compile CMOCs, since not all parts of the configurations will always be articulated in the same source.

### Box 1: Data analysis in realist reviews

Questions to guide data analysis in a realist review:

Relevance:

- Are there sections of text within this source that are relevant to programme theory development?

Rigour - judgements about trustworthiness:

- Are these data sufficiently trustworthy to warrant making changes (if needed) to any aspect of the programme theory?

Interpretation of meaning:

- If the section of text is relevant and trustworthy enough, do its contents provide data that may be interpreted as functioning as context, mechanism or outcome?

Interpretations and judgements about Context-Mechanism-Outcome-Configurations:

- For the data that have been interpreted as functioning as context, mechanism or outcome, which Context-Mechanism-Outcome-Configuration (CMOC) (partial or complete) does it belong to?

- Are there further data to inform this particular CMOCs contained within this source or other sources? If so, in which other documents?

- How does this particular CMOC relate to other CMOCs that have already been developed?

Interpretations and judgements about programme theory:

- How does this particular (full or partial) CMOC relate to the programme theory?

- Within this same source are there data which informs how the CMOC relates to the programme theory? If not, are there data in other sources? Which ones?

- In light of this particular CMOC and any supporting data, does the programme theory need to be changed?

Within the analytic process set out in Box 1 above (adapted from Papoutsis et al. 2017)<sup>34</sup>, we shall use interpretive cross-case comparison to understand and explain how and why observed outcomes have occurred, for example, by comparing interventions where remediation has been 'successful' against those which have not, to understand how context has influenced reported findings. When working through the questions set out, where appropriate we shall use the following forms of reasoning to make sense of the data:

- Juxtaposition of data: for example, where data about behaviour change in one source enable insights into data about outcomes in another source.

- Reconciling of data: where data differ in apparently similar circumstances, further investigation is appropriate in order to find explanations for why these differences have occurred.

- Adjudication of data: on the basis of methodological strengths or weaknesses.

1  
2  
3 - Consolidation of data: where outcomes differ in particular contexts, an explanation can be  
4 constructed of how and why these outcomes occur differently.  
5

6 During the review, we shall move iteratively between the analysis of particular examples, refinement  
7 of the programme theory, and further iterative searching for data to test particular theories. The  
8 final realist programme theory will be presented in a diagram and through a narrative description of  
9 CMOCs.  
10

### 11 **Patient and Public Involvement**

12 Patient and public involvement (PPI) has been central to the design of this study and will continue to  
13 be a meaningful component of this review. Discussions with an existing PPI forum, attached to  
14 ongoing research collaborations, had drawn attention to the lack of research on remediation and its  
15 implications for patient safety. These concerns helped define the research focus and forum  
16 members provided critical feedback on various iterations of the funding proposal. A University of  
17 Plymouth Patient Partner (LW) is a co-applicant on the study and there is lay representation at all  
18 stages of the research, including dissemination, through the stakeholder group.  
19  
20  
21

## 22 **DISCUSSION**

### 23 **Importance of the research**

24 The proposed research will make an empirical contribution to the existing body of knowledge by  
25 developing a transferable realist programme theory of how remediation of doctors works, for whom  
26 and in what contexts. Achieving this type of understanding will also enable us to develop  
27 recommendations to support the optimal tailoring, design and implementation of remediation  
28 interventions for underperforming doctors in order to support patient safety.  
29  
30

31 This research will generate new knowledge about a poorly understood area of healthcare delivery  
32 that directly affects the standards of care received by patients. It is thus consistent with a focus on  
33 improving the quality and the organisation of health services, in this instance within the specific area  
34 of improving the design and delivery of remediation programmes.  
35

36 The research will be carried out with NCAS as a collaborative partner, and will therefore have a  
37 direct impact in terms of shaping NCAS remediation programmes in the United Kingdom. This  
38 collaboration, combined with expert input from our stakeholder group, will ensure that the study  
39 will deliver findings that will directly feed into policy and practice development and have  
40 international significance. The self-evident importance of doctor performance for patient safety, and  
41 the practical, moral, political and financial imperatives of offering underperforming doctors the  
42 opportunity to remediate, mean that this will be an area of sustained international interest in the  
43 area of health services research.  
44  
45

### 46 **Dissemination**

47 Our dissemination strategy will build on the participatory approach (involving stakeholders) that we  
48 shall develop throughout the preceding stages of the review. We shall work with the representatives  
49 from NCAS, who are part of the stakeholder group, to refine our dissemination strategy throughout  
50 the study. We shall also seek to engage with other audiences who have a stake in our research.  
51

52 This dissemination strategy will aim to have impact along three primary trajectories:  
53

54 *Instrumental impact:* The study will inform and develop the policy and practice of remediation. This  
55 refers to the findings of the review itself and our dissemination of review findings to key  
56  
57

1  
2  
3 stakeholders such as NCAS and the GMC in order to provide tangible improvement to the practice of  
4 remediation in NHS organisations.

5  
6 *Conceptual impact:* The study will be the first of its kind to conduct a realist review of remediation  
7 and to develop a programme theory of remediation. The systematic reviews that exist on this topic  
8 are now dated (2009 and 2013); no one has, as yet, conducted a review of remediation to work out  
9 what works, for whom, how, why and in what contexts (i.e. a realist review) as proposed by Cleland  
10 et al in the later review.

11  
12 *Capacity building:* The networks that are developed through conducting and disseminating the  
13 research will enhance the collective technical expertise in the area for further research and  
14 development of remediation practices.

15  
16 We want to ensure that the outputs of this project will be useful to the NHS. To do this we shall use  
17 the Knowledge-To-Action Cycle framework provided by the KT Clearinghouse.<sup>35</sup> This is a framework  
18 that provides knowledge translation resources funded by the Canadian Institute of Health Research.  
19 The Knowledge-to-Action Cycle graphically sets out the steps necessary in bridging the knowledge-  
20 to-action gap. Specifically, with input from our stakeholder group, this realist review will generate  
21 knowledge that will inform the following phases of the Knowledge-To-Action Cycle framework by:  
22 producing stakeholder relevant knowledge; adapting knowledge to local context; and assessing  
23 barriers to knowledge use.

24  
25  
26  
27 We shall seek to operationalise this framework by:

28  
29 **1) The findings from the review will be submitted for publication to a high-impact peer-reviewed**  
30 **journal**

31  
32 We anticipate that this publication is most likely to impact at an academic level – informing the  
33 understanding and theoretical basis of remediation behaviour change interventions.

34  
35 **2) A 'user guide' that outlines practical advice to optimise, tailor and implement existing**  
36 **interventions designed to change behaviour through remediation**

37  
38 With this output, we shall aim to impact on the landscape of current remediation provision. This  
39 document will be targeted at educational providers and regulators. These include medical schools,  
40 Local Education Training Boards and Deaneries, as well as Health Education England, NHS Education  
41 Scotland, the NHS, the GMC and NCAS. These bodies are at the delivery end of existing remediation  
42 practices that we wish to inform and help improve.

43  
44 We shall draw on the expertise of the academics and educators within our project team and  
45 combine this with the policy expertise of the wider stakeholder group to produce an accessible,  
46 relevant and practical guide. This will ensure that it can be used to bring about direct change in  
47 policy and remediation practice.

48  
49 **3) User-friendly summaries of the review findings that are tailored to the needs of interested**  
50 **audiences:**

51  
52 Stakeholders will be invited to attend presentations on the developing programme theory so that  
53 research dissemination can also benefit from their feedback and reflection. In addition to national  
54 and regional dissemination, research findings will be presented locally and internationally. Locally,  
55 we shall continue to work with researchers across Plymouth through CAMERA's monthly meetings to  
56  
57

1  
2  
3  
4  
5  
6  
7  
8  
9  
10  
11  
12  
13  
14  
15  
16  
17  
18  
19  
20  
21  
22  
23  
24  
25  
26  
27  
28  
29  
30  
31  
32  
33  
34  
35  
36  
37  
38  
39  
40  
41  
42  
43  
44  
45  
46  
47  
48  
49  
50  
51  
52  
53  
54  
55  
56  
57  
58  
59  
60

share and promote research. At an international level, our established networks in North America and Australasia will continue, allowing international comparisons between practice in the UK and systems for remediating poor performance around the world.

To support PPI beyond the stakeholder group, the research will be summarised in a newly developed website.<sup>36</sup>

For peer review only

### **Ethics**

As this is a review of existing literature, no ethical approval is needed.

### **Contributors**

JA conceptualised the study with input from TP. NB led the development of the protocol with input from JA, TP, GW, LP-C, JC, AW, LW. AW scoped and designed the search strategy. Methodological advice was given by GW and NB. TP wrote the first draft of this manuscript. JA, NB, GW, LP-C, JC, AW, LW critically reviewed it and provided comments for improvement. We would like to thank our PPI partners for their input into the original funding application for this study and for their continued support for this research.

### **Funding acknowledgement**

This project was funded by the NIHR Health Services and Delivery Research Programme (HS&DR 17/06/04)

This research is also supported by the National Institute for Health Research Collaboration for Leadership in Applied Health Research and Care South West Peninsula (NIHR CLAHRC South West Peninsula).

GW's salary is partly supported by The Evidence Synthesis Working Group of the National Institute for Health Research School for Primary Care Research (NIHR SPCR) [Project Number 390].

### **Department of Health and Social Care disclaimer**

The views expressed are those of the author(s) and not necessarily those of the NHS, the NIHR or the Department of Health and Social Care.

### **Competing interests**

None



## REFERENCES

1. Hogan H, Healey F, Neale G, et al. Preventable deaths due to problems in care in English acute hospitals: a retrospective case record review study. *BMJ quality & safety* 2012;bmjqs-2012-001159.
2. Cox J, King J, Hutchinson A, et al. Understanding doctors' performance: Radcliffe Publishing 2006.
3. Kalet A, Chou CL, Ellaway RH. To fail is human: remediating remediation in medical education. *Perspectives on Medical Education* 2017;6(6):418-24.
4. Kalet A, Chou CL. Remediation in medical education: Springer 2014.
5. Prescott-Clements L, Voller V, Bell M, et al. Rethinking Remediation: A Model to Support the Detailed Diagnosis of Clinicians' Performance Problems and the Development of Effective Remediation Plans. *Journal of Continuing Education in the Health Professions* 2017;37(4):245-54.
6. Goulet F, Thiffault J, Ladouceur R. Remediation and rehabilitation programmes for health professionals: challenges for the future. *BMJ Quality & Safety* 2017;26(12):941.
7. Kalet A, Guerrasio J, Chou CL. Twelve tips for developing and maintaining a remediation program in medical education. *Medical Teacher* 2016;38(8):787-92. doi: 10.3109/0142159X.2016.1150983
8. Cohen D, Rhydderch M, Cooper I. Managing remediation. In: Swanwick T, ed. Understanding Medical Education: Evidence, Theory and Practice. Chichester Wiley Blackwell 2014:366-78.
9. Price T, Archer J. UK Policy on Doctor Remediation: Trajectories and Challenges. *Journal of Continuing Education in the Health Professions* 2017;37(3):207-11.
10. Personal Social Services Research Unit. Unit Costs of Health and Social Care. In: Curtis L, ed.: Personal Social Services Research Unit (PSSRU), 2012.
11. NHS Litigation Authority. NHS Litigation Authority: Annual report and accounts 2015/16, 2016.
12. General Medical Council. The state of medical education and practice in the UK 2017. London, 2017.
13. Crisp N, Chen L. Global supply of health professionals. *New England Journal of Medicine* 2014;370(10):950-57.
14. Zurn P, Dal Poz MR, Stilwell B, et al. Imbalance in the health workforce. *Human Resources for Health* 2004;2(1):13. doi: 10.1186/1478-4491-2-13
15. Hauer KE, Ciccone A, Henzel TR, et al. Remediation of the deficiencies of physicians across the continuum from medical school to practice: a thematic review of the literature. *Academic Medicine* 2009;84(12):1822-32.
16. Cleland J, Leggett H, Sandars J, et al. The remediation challenge: theoretical and methodological insights from a systematic review. *Medical education* 2013;47(3):242-51.
17. Bourgeois-Law G, Teunissen PW, Regehr G. Remediation in Practicing Physicians: Current and Alternative Conceptualizations. *Academic Medicine* 2018; Publish Ahead of Print doi: 10.1097/acm.0000000000002266
18. Wong G, Greenhalgh T, Westhorp G, et al. Realist methods in medical education research: what are they and what can they contribute? *Medical Education* 2012;46(1):89-96.
19. Wong G, Greenhalgh T, Westhorp G, et al. Development of methodological guidance, publication standards and training materials for realist and meta-narrative reviews: the RAMESES (Realist And Meta-narrative Evidence Syntheses - Evolving Standards). *BMC Med* 2013;11(21)
20. Pawson R, Tilley N. Realistic evaluation: Sage 1997.
21. Pawson R, Greenhalgh T, Harvey G, et al. Realist review—a new method of systematic review designed for complex policy interventions. *Journal of health services research & policy* 2005;10(suppl 1):21-34.
22. Wong G, Greenhalgh T, Westhorp G, et al. Development of methodological guidance, publication standards and training materials for realist and meta-narrative reviews: the RAMESES

- (Realist And Meta-narrative Evidence Syntheses–Evolving Standards) project. *Health Services and Delivery Research* 2014;2(30)
23. Moher D, Shamseer L, Clarke M, et al. Preferred reporting items for systematic review and meta-analysis protocols (PRISMA-P) 2015 statement. *Systematic reviews* 2015;4(1):1.
24. Aeder L, Fogel J, Schaeffer H. Pediatric board review course for residents “at risk”. *Clinical pediatrics* 2010;49(5):450-56.
25. Borman KR. Does academic intervention impact ABS qualifying examination results? *Current surgery* 2006;63(6):367-72.
26. Brooks R, Robb A, Tabak D. A remedial course on interviewing skills. *Academic Medicine* 1996;71(5):560.
27. Kern DE, Wright SM, Carrese JA, et al. Personal growth in medical faculty: a qualitative study. *Western Journal of Medicine* 2001;175(2):92.
28. Levine RB, Haidet P, Kern DE, et al. Personal growth during internship: A qualitative analysis of interns' responses to key questions. *Journal of general internal medicine* 2006;21(6):564-69.
29. Grol R. Changing physicians' competence and performance: finding the balance between the individual and the organization. *Journal of Continuing Education in the Health Professions* 2002;22(4):244-51.
30. Hays RB, Jolly B, Caldon L, et al. Is insight important? Measuring capacity to change performance. *Medical education* 2002;36(10):965-71.
31. Ehrlinger J, Johnson K, Banner M, et al. Why the unskilled are unaware: Further explorations of (absent) self-insight among the incompetent. *Organizational behavior and human decision processes* 2008;105(1):98-121.
32. Kruger J, Dunning D. Unskilled and unaware of it: how difficulties in recognizing one's own incompetence lead to inflated self-assessments. *Journal of personality and social psychology* 1999;77(6):1121.
33. International Q. NVivo qualitative data analysis software. Version 11, 2015.
34. Papoutsis C, Mattick K, Pearson M, et al. Social and professional influences on antimicrobial prescribing for doctors-in-training: a realist review. *Journal of Antimicrobial Chemotherapy* 2017;72(9):2418-30. doi: 10.1093/jac/dkx194
35. KT Clearinghouse. KT Tools [cited 2018. Available from: <https://knowledgetranslation.net/kt-tools/2018>.
36. RESTORE. Realist Synthesis of Doctor Remediation [Available from: <https://www.plymouth.ac.uk/your-university/about-us/university-structure/faculties/medicine-dentistry/pupsm-d-research/camera/realist-synthesis-of-doctor-remediation-restore>.

# Reporting checklist for protocol of a systematic review.

|    |    | Reporting Item | Page Number |
|----|----|----------------|-------------|
| 12 | 13 | 14             | 15          |
| 16 | 17 | 18             | 19          |
| 20 | 21 | 22             | 23          |
| 25 | 26 | 27             | 28          |
| 32 | 33 | 34             | 35          |
| 36 | 37 | 38             | 39          |
| 40 | 41 | 42             | 43          |
| 44 | 45 | 46             | 47          |
| 48 | 49 | 50             | 51          |
| 52 | 53 | 54             | 55          |
| 56 | 57 | 58             | 59          |
| 57 | 58 | 59             | 60          |
| 60 |    |                |             |

|    |                      |                                                                       |                               |
|----|----------------------|-----------------------------------------------------------------------|-------------------------------|
|    |                      | context of what is already known                                      |                               |
| 1  |                      |                                                                       |                               |
| 2  | Objectives           | <a href="#">#7</a> Provide an explicit statement of the               | 4                             |
| 3  |                      | question(s) the review will address with                              |                               |
| 4  |                      | reference to participants, interventions,                             |                               |
| 5  |                      | comparators, and outcomes (PICO)                                      |                               |
| 6  |                      |                                                                       |                               |
| 7  |                      |                                                                       |                               |
| 8  |                      |                                                                       |                               |
| 9  | Eligibility criteria | <a href="#">#8</a> Specify the study characteristics (such as         | 6-7                           |
| 10 |                      | PICO, study design, setting, time frame) and                          |                               |
| 11 |                      | report characteristics (such as years                                 |                               |
| 12 |                      | considered, language, publication status) to be                       |                               |
| 13 |                      | used as criteria for eligibility for the review                       |                               |
| 14 |                      |                                                                       |                               |
| 15 |                      |                                                                       |                               |
| 16 |                      |                                                                       |                               |
| 17 | Information          | <a href="#">#9</a> Describe all intended information sources          | 6-7                           |
| 18 | sources              | (such as electronic databases, contact with                           |                               |
| 19 |                      | study authors, trial registers or other grey                          |                               |
| 20 |                      | literature sources) with planned dates of                             |                               |
| 21 |                      | coverage                                                              |                               |
| 22 |                      |                                                                       |                               |
| 23 |                      |                                                                       |                               |
| 24 |                      |                                                                       |                               |
| 25 |                      |                                                                       |                               |
| 26 | Search strategy      | <a href="#">#10</a> Present draft of search strategy to be used for   | 6-7                           |
| 27 |                      | at least one electronic database, including                           |                               |
| 28 |                      | planned limits, such that it could be repeated                        |                               |
| 29 |                      |                                                                       |                               |
| 30 |                      |                                                                       |                               |
| 31 | Study records -      | <a href="#">#11a</a> Describe the mechanism(s) that will be used      | 6-7                           |
| 32 | data                 | to manage records and data throughout the                             |                               |
| 33 | management           | review                                                                |                               |
| 34 |                      |                                                                       |                               |
| 35 |                      |                                                                       |                               |
| 36 | Study records -      | <a href="#">#11b</a> State the process that will be used for          | 6-7                           |
| 37 | selection            | selecting studies (such as two independent                            |                               |
| 38 | process              | reviewers) through each phase of the review                           |                               |
| 39 |                      | (that is, screening, eligibility and inclusion in                     |                               |
| 40 |                      | meta-analysis)                                                        |                               |
| 41 |                      |                                                                       |                               |
| 42 |                      |                                                                       |                               |
| 43 |                      |                                                                       |                               |
| 44 |                      |                                                                       |                               |
| 45 | Study records -      | <a href="#">#11c</a> Describe planned method of extracting data       | 6-7                           |
| 46 | data collection      | from reports (such as piloting forms, done                            |                               |
| 47 | process              | independently, in duplicate), any processes for                       |                               |
| 48 |                      | obtaining and confirming data from                                    |                               |
| 49 |                      | investigators                                                         |                               |
| 50 |                      |                                                                       |                               |
| 51 |                      |                                                                       |                               |
| 52 |                      |                                                                       |                               |
| 53 | Data items           | <a href="#">#12</a> List and define all variables for which data will | n/a, this is a realist review |
| 54 |                      | be sought (such as PICO items, funding                                |                               |
| 55 |                      | sources), any pre-planned data assumptions                            |                               |
| 56 |                      | and simplifications                                                   |                               |
| 57 |                      |                                                                       |                               |
| 58 |                      |                                                                       |                               |
| 59 |                      |                                                                       |                               |
| 60 |                      |                                                                       |                               |

|    |                 |                      |                                                          |                             |
|----|-----------------|----------------------|----------------------------------------------------------|-----------------------------|
| 1  | Outcomes and    | <a href="#">#13</a>  | List and define all outcomes for which data will         | n/a, the realist review     |
| 2  | prioritization  |                      | be sought, including prioritization of main and          | method does not specify     |
| 3  |                 |                      | additional outcomes, with rationale                      | outcomes.                   |
| 4  |                 |                      |                                                          |                             |
| 5  |                 |                      |                                                          |                             |
| 6  | Risk of bias in | <a href="#">#14</a>  | Describe anticipated methods for assessing               | n/a, realist methods would  |
| 7  | individual      |                      | risk of bias of individual studies, including            | not assess risk of bias     |
| 8  | studies         |                      | whether this will be done at the outcome or              | explicitly. However, rigor  |
| 9  |                 |                      | study level, or both; state how this information         | is important, see page 8.   |
| 10 |                 |                      | will be used in data synthesis                           |                             |
| 11 |                 |                      |                                                          |                             |
| 12 |                 |                      |                                                          |                             |
| 13 |                 |                      |                                                          |                             |
| 14 | Data synthesis  | <a href="#">#15a</a> | Describe criteria under which study data will            | n/a, not a quantitative     |
| 15 |                 |                      | be quantitatively synthesised                            | synthesis                   |
| 16 |                 |                      |                                                          |                             |
| 17 |                 |                      |                                                          |                             |
| 18 |                 | <a href="#">#15b</a> | If data are appropriate for quantitative                 | n/a, as above               |
| 19 |                 |                      | synthesis, describe planned summary                      |                             |
| 20 |                 |                      | measures, methods of handling data and                   |                             |
| 21 |                 |                      | methods of combining data from studies,                  |                             |
| 22 |                 |                      | including any planned exploration of                     |                             |
| 23 |                 |                      | consistency (such as I <sup>2</sup> , Kendall's $\tau$ ) |                             |
| 24 |                 |                      |                                                          |                             |
| 25 |                 |                      |                                                          |                             |
| 26 |                 |                      |                                                          |                             |
| 27 |                 |                      |                                                          |                             |
| 28 |                 | <a href="#">#15c</a> | Describe any proposed additional analyses                | 7-8                         |
| 29 |                 |                      | (such as sensitivity or subgroup analyses,               |                             |
| 30 |                 |                      | meta-regression)                                         |                             |
| 31 |                 |                      |                                                          |                             |
| 32 |                 |                      |                                                          |                             |
| 33 |                 |                      |                                                          |                             |
| 34 |                 | <a href="#">#15d</a> | If quantitative synthesis is not appropriate,            | 7-8                         |
| 35 |                 |                      | describe the type of summary planned                     |                             |
| 36 |                 |                      |                                                          |                             |
| 37 | Meta-bias(es)   | <a href="#">#16</a>  | Specify any planned assessment of meta-                  | n/a, again, realist methods |
| 38 |                 |                      | bias(es) (such as publication bias across                | would not assess risk of    |
| 39 |                 |                      | studies, selective reporting within studies)             | bias explicitly. However,   |
| 40 |                 |                      |                                                          | rigor is important, see     |
| 41 |                 |                      |                                                          | page 8.                     |
| 42 |                 |                      |                                                          |                             |
| 43 |                 |                      |                                                          |                             |
| 44 |                 |                      |                                                          |                             |
| 45 | Confidence in   | <a href="#">#17</a>  | Describe how the strength of the body of                 | 7-8                         |
| 46 | cumulative      |                      | evidence will be assessed (such as GRADE)                |                             |
| 47 | evidence        |                      |                                                          |                             |
| 48 |                 |                      |                                                          |                             |
| 49 |                 |                      |                                                          |                             |
| 50 |                 |                      |                                                          |                             |

The PRISMA-P checklist is distributed under the terms of the Creative Commons Attribution License CC-BY 4.0. This checklist can be completed online using <https://www.goodreports.org/>, a tool made by the [EQUATOR Network](#) in collaboration with [Penelope.ai](#)
