# Supplementary material for: Remediating doctors’ performance to restore patient safety: a realist review protocol
Source: PubMed Central journal article supplement (PMC6224734; doi:10.1136/bmjopen-2018-025943), 2018-10-28
Supplement: bmjopen-2018-025943.reviewer_comments.pdf [file bmjopen-2018-025943.reviewer_comments.pdf]

## PEER REVIEW HISTORY

BMJ Open publishes all reviews undertaken for accepted manuscripts. Reviewers are asked to complete a checklist review form (<http://bmjopen.bmj.com/site/about/resources/checklist.pdf>) and are provided with free text boxes to elaborate on their assessment. These free text comments are reproduced below.

## ARTICLE DETAILS

|                            |                                                                                                                                             |
|----------------------------|---------------------------------------------------------------------------------------------------------------------------------------------|
| <b>TITLE (PROVISIONAL)</b> | Remediating doctors' performance to restore patient safety: A realist review protocol                                                       |
| <b>AUTHORS</b>             | Price, Tristan; Brennan, Nicola; Cleland, Jennifer; Prescott-Clements, Linda; Wanner, Amanda; Withers, Lyndsey; Wong, Geoff; Archer, Julian |

This article was not externally reviewed at BMJ Open. Protocols that have been independently assessed prior to submission to BMJ Open are usually fast-tracked to publication on the grounds that further substantial changes will not be possible. This independent assessment will usually be external, independent review for both a substantial grant award from a non-commercial or government funder and ethics approval.
